# Supplementary material
Source: publisher figshare collection journal article supplement (https://gsajournals.figshare.com/ndownloader/files/17502338)
Supplement: Supplementary file 1 [file 17502338]

## Sheet: Table S2
TABLE S2 | Independent assortment of Cf-Ecp5 in LA0722 from markers linked to known Cf loci. Segregation ratios of 59 wild-type F2 plants from a Cf0 x LA0722 cross. Haplotype composition is shown for each marker. The chromosome and coordinates of each marker are shown in megabases (Mb). LoxR is located tightly linked to the MW locus, 0124F20 is linked to the Cf-11/Cf-3 locus, and cLET-8-4K is lin…
Haplotype	LoxR	01240F20	cLET-8-K4
Chromosome	1	11	12
Coordinates	1.124	1.321	3.205
LA0722/LA0722	16	13	13
LA0722/Cf0	33	31	28
Cf0/Cf0	10	15	18
p-value(χ2)	0.56	0.928	0.79
